# Supplementary material for: Understanding Biases in Ribosome Profiling Experiments Reveals Signatures of Translation Dynamics in Yeast
Source: PubMed Central journal article supplement (PMC4684354; doi:10.1371/journal.pgen.1005732), 2015-12-11
Supplement: pgen.1005732.s019.pdf [file pgen.1005732.s019.pdf]

| First author of study   | Accession number      | Representative sample(s) used                                                                      |
|-------------------------|-----------------------|----------------------------------------------------------------------------------------------------|
| Albert [1]              | GSE55400              | BY_FP                                                                                              |
| Artieri [2]             | GSE50049              | non_multiplexed                                                                                    |
| Artieri [3]             | SRP033885             | Mixed_parental_ribosome_protected_fragments_replicate_1                                            |
| Brar [4]                | GSE34082              | footprints_for_exponential_vegetative_cells_of_the_strain_gb15_used_for_the_traditional_timecourse |
| Dunn [5]                | obtained from authors | only one sample                                                                                    |
| Gardin [6]              | GSE51164              | ribosome_footprints_for_wildtype                                                                   |
| Gerashchenko (NAR) [7]  | GSE59573              | many samples used                                                                                  |
| Gerashchenko (PNAS) [8] | obtained from authors | Initial_rep2_foot                                                                                  |
| Guydosh [9]             | GSE52968              | wild-type_CHX (note: CHX here refers to lysis buffer, not pretreatment)                            |
| Ingolia [10]            | GSE13750              | Footprints-rich-1                                                                                  |
| Ours                    | TBD                   | WT_2_FP                                                                                            |
| Jan [11]                | GSE61012              | sec63mVenusBirA_+CHX_7minBiotin_input (CHX)<br>sec63mVenusBirA_-CHX_7minBiotin_input (no CHX)      |
| Lareau [12]             | GSE58321              | Cycloheximide_replicate_1 (CHX)<br>Untreated_replicate_1 (no CHX)                                  |
| Mcmanus [13]            | GSE52119              | S_cerevisiae_Ribo-seq_Rep_1                                                                        |
| Nedialkova [14]         | GSE67387              | WT_ribo_YPD_rep1 (CHX)<br>WT_ribo_YPD_noCHX_rep2 (no CHX)                                          |
| Pop [15]                | GSE63789              | WT_footprint                                                                                       |
| Sen [16]                | GSE66411              | ribo_wild-type_TIF1_replicate_1_30_deg                                                             |
| Weinberg                | GSE53268              | Cerevisiae_RPF                                                                                     |
| Williams [17]           | GSE61011              | Om45mVenusBirA_+CHX_2minBiotin_input (CHX)<br>Om45mVenusBirA_-CHX_2minBiotin_input (no CHX)        |
| Young [18]              | GSE69414              | wild-type                                                                                          |
| Zinshteyn [19]          | GSE45366              | WT_Ribosome_Footprint_1                                                                            |

Table 1: Data sources

## References

- [1] Frank W. Albert, Dale Muzzey, Jonathan S. Weissman, and Leonid Kruglyak. Genetic Influences on Translation in Yeast. *PLoS Genetics*, 10(10):e1004692, 2014.
- [2] Carlo G Artieri and Hunter B Fraser. Accounting for biases in riboprofiling data indicates a major role for proline in stalling translation. *Genome Research*, pages 2011–2021, 2014.
- [3] Carlo G Artieri and Hunter B Fraser. Evolution at two levels of gene expression in yeast. *Genome research*, 24(3):411–21, March 2014.
- [4] GA Brar, Moran Yassour, Nir Friedman, and Aviv Regev. High-resolution view of the yeast meiotic program revealed by ribosome profiling. *Science*, 335(February), 2012.
- [5] Joshua G Dunn, Catherine K Foo, Nicolette G Belletier, Elizabeth R Gavis, and Jonathan S Weissman. Ribosome profiling reveals pervasive and regulated stop codon readthrough in *Drosophila melanogaster*. *eLife*, 2:e01179, January 2013.
- [6] Justin Gardin, Rukhsana Yeasmin, Alisa Yurovsky, Ying Cai, Steve Skiena, and Bruce Futcher. Measurement of average decoding rates of the 61 sense codons in vivo. *eLife*, 3:1–20, January 2014.
- [7] Maxim V Gerashchenko and Vadim N Gladyshev. Translation inhibitors cause abnormalities in ribosome profiling experiments. *Nucleic acids research*, 42(17):1–7, July 2014.
- [8] Maxim V Gerashchenko, Alexei V Lobanov, and Vadim N Gladyshev. Genome-wide ribosome profiling reveals complex translational regulation in response to oxidative stress. *Proceedings of the National Academy of Sciences of the United States of America*, 109(43):17394–9, October 2012.
- [9] Nicholas R. Guydosh and Rachel Green. Dom34 Rescues Ribosomes in 3' Untranslated Regions. *Cell*, 156(5):950–962, February 2014.
- [10] Nicholas T Ingolia, Sina Ghaemmaghami, John R S Newman, and Jonathan S Weissman. Genome-Wide Analysis in Vivo of Translation with Nucleotide Resolution Using Ribosome Profiling. *Science*, 324(April), 2009.
- [11] C. H. Jan, C. C. Williams, and J. S. Weissman. Principles of ER cotranslational translocation revealed by proximity-specific ribosome profiling. *Science*, 2014.
- [12] Liana F Lareau, Dustin H Hite, Gregory J Hogan, and Patrick O Brown. Distinct stages of the translation elongation cycle revealed by sequencing ribosome-protected mRNA fragments. *eLife*, 3:e01257, January 2014.
- [13] C Joel McManus, Gemma E May, Pieter Speelman, and Alan Shteyman. Ribosome profiling reveals post-transcriptional buffering of divergent gene expression in yeast. *Genome research*, 24(3):422–30, March 2014.

- [14] Danny D Nedialkova and Sebastian a Leidel. Optimization of Codon Translation Rates via tRNA Modifications Maintains Proteome Integrity Article Optimization of Codon Translation Rates via tRNA Modifications Maintains Proteome Integrity. *Cell*, pages 1–13, 2015.
- [15] Cristina Pop, Silvi Rouskin, Nicholas T Ingolia, Lu Han, Eric M Phizicky, Jonathan S Weissman, and Daphne Koller. Causal signals between codon bias , mRNA structure , and the efficiency of translation and elongation. *Molecular Systems Biology*, pages 1–15, 2014.
- [16] Neelam Dabas Sen, Fujun Zhou, Nicholas T Ingolia, and Alan G Hinnebusch. Genome-wide analysis of translational efficiency reveals distinct but overlapping functions of yeast DEAD-box RNA helicases Ded1 and eIF4A. *Genome research*, pages 1–10, 2015.
- [17] Christopher C Williams, Calvin H Jan, and Jonathan S Weissman. Targeting and plasticity of mitochondrial proteins revealed by proximity-specific ribosome profiling. *Science*, 346(6210), 2014.
- [18] David J Young, Nicholas R Guydosh, Fan Zhang, Alan G Hinnebusch, and Rachel Green. Rli1/ABCE1 Recycles Terminating Ribosomes and Controls Translation Reinitiation in 3'UTRs In Vivo. *Cell*, 162(4):872–84, 2015.
- [19] Boris Zinshteyn and Wendy V Gilbert. Loss of a conserved tRNA anticodon modification perturbs cellular signaling. *PLoS genetics*, 9(8):e1003675, August 2013.
